# Supplementary material for: Ionothermal synthesis of a 3D dysprosium–1,4-benzenedicarboxylate framework based on the 1D rod-shaped dysprosium–carboxylate building blocks exhibiting slow magnetization relaxation
Source: Royal Society of Chemistry journal article supplement (doi:10.1039/c3ce41624k), 2013-11-12
Supplement: c3ce41624k.pdf [file c3ce41624k.pdf]

Supporting Information

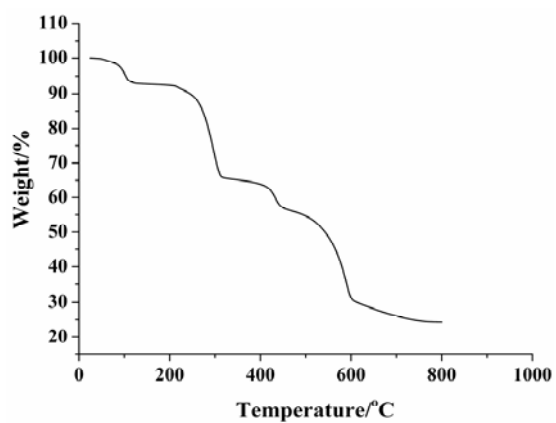

Fig. S1 TGA curve of **1**

5

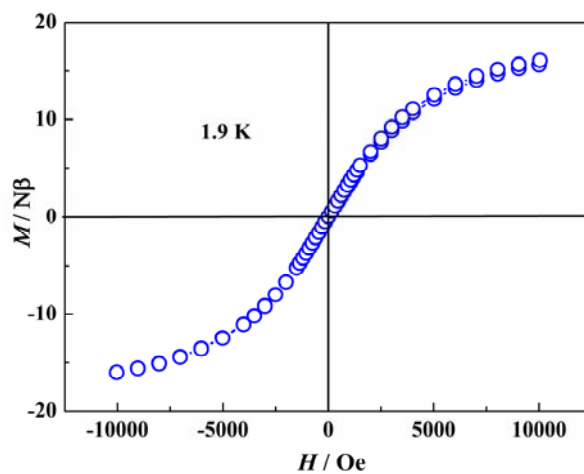

Fig. S2 Field dependence of the magnetization of **1** measured at 1.9 K

10

15

20

25

**Table S1.** Selected Bond Angles (Å) of **1**<sup>a</sup>.

| Compound <b>1</b> |            |               |            |
|-------------------|------------|---------------|------------|
| O20A–Dy1–O8B      | 86.85(11)  | O13E–Dy2–O11  | 151.42(10) |
| O20A–Dy1–O6B      | 111.78(13) | O3C–Dy2–O11   | 121.27(10) |
| O8B–Dy1–O6B       | 72.45(10)  | O16–Dy2–O11   | 112.27(10) |
| O20A–Dy1–O15      | 150.62(10) | O4C–Dy2–O11   | 78.27(9)   |
| O8B–Dy1–O15       | 87.54(9)   | O10D–Dy2–O12  | 94.43(9)   |
| O6B–Dy1–O15       | 93.84(11)  | O4C–Dy2–O12   | 65.74(8)   |
| O20A–Dy1–O18      | 76.08(10)  | O11–Dy2–O12   | 51.44(8)   |
| O8B–Dy1–O18       | 134.63(9)  | O10D–Dy2–O15  | 123.83(9)  |
| O6B–Dy1–O18       | 75.56(11)  | O1–Dy2–O15    | 151.20(9)  |
| O15–Dy1–O18       | 126.18(9)  | O13E–Dy2–O15  | 86.57(10)  |
| O20A–Dy1–O12      | 89.35(11)  | O3C–Dy2–O15   | 75.60(9)   |
| O8B–Dy1–O12       | 137.16(9)  | O16–Dy2–O15   | 52.30(8)   |
| O6B–Dy1–O12       | 146.26(10) | O4C–Dy2–O15   | 69.31(8)   |
| O15–Dy1–O12       | 75.52(8)   | O11–Dy2–O15   | 120.03(8)  |
| O18–Dy1–O12       | 85.07(9)   | O12–Dy2–O15   | 69.31(7)   |
| O20A–Dy1–O17      | 128.13(10) | O7–Dy3–O5     | 84.75(14)  |
| O8B–Dy1–O17       | 136.86(10) | O7–Dy3–O2     | 103.25(12) |
| O6B–Dy1–O17       | 71.19(11)  | O5–Dy3–O2     | 163.31(13) |
| O15–Dy1–O17       | 72.63(9)   | O7–Dy3–O9D    | 151.56(11) |
| O18–Dy1–O17       | 53.85(9)   | O5–Dy3–O9D    | 82.46(14)  |
| O12–Dy1–O17       | 75.07(9)   | O2–Dy3–O9D    | 96.01(13)  |
| O20A–Dy1–O4C      | 79.39(9)   | O7–Dy3–O19F   | 80.83(12)  |
| O8B–Dy1–O4C       | 70.07(9)   | O5–Dy3–O19F   | 114.97(13) |
| O6B–Dy1–O4C       | 140.12(10) | O2–Dy3–O19F   | 81.06(13)  |
| O15–Dy1–O4C       | 71.59(8)   | O9D–Dy3–O19F  | 81.74(13)  |
| O18–Dy1–O4C       | 143.01(9)  | O7–Dy3–O14E   | 80.42(12)  |
| O12–Dy1–O4C       | 67.30(8)   | O5–Dy3–O14E   | 86.50(15)  |
| O17–Dy1–O4C       | 133.03(9)  | O2–Dy3–O14E   | 80.54(15)  |
| O10D–Dy2–O1       | 82.67(10)  | O9D–Dy3–O14E  | 123.80(13) |
| O10D–Dy2–O13E     | 82.73(10)  | O19F–Dy3–O14E | 149.87(15) |
| O1–Dy2–O13E       | 85.99(11)  | O7–Dy3–O5     | 84.75(14)  |
| O10D–Dy2–O3C      | 148.00(9)  | O7–Dy3–O2     | 103.25(12) |
| O1–Dy2–O3C        | 75.63(10)  | O5–Dy3–O2     | 163.31(13) |
| O13E–Dy2–O3C      | 72.67(9)   | O7–Dy3–O9D    | 151.56(11) |
| O10D–Dy2–O16      | 71.75(9)   | O5–Dy3–O9D    | 82.46(14)  |
| O1–Dy2–O16        | 149.27(10) | O2–Dy3–O9D    | 96.01(13)  |
| O13E–Dy2–O16      | 74.36(11)  | O7–Dy3–O19F   | 80.83(12)  |
| O3C–Dy2–O16       | 118.81(9)  | O5–Dy3–O19F   | 114.97(13) |
| O10D–Dy2–O4C      | 152.05(9)  | O2–Dy3–O19F   | 81.06(13)  |
| O1–Dy2–O4C        | 92.48(9)   | O9D–Dy3–O19F  | 81.74(13)  |
| O13E–Dy2–O4C      | 124.54(9)  | O7–Dy3–O14E   | 80.42(12)  |
| O3C–Dy2–O4C       | 53.58(8)   | O5–Dy3–O14E   | 86.50(15)  |
| O16–Dy2–O4C       | 118.08(9)  | O2–Dy3–O14E   | 80.54(15)  |
| O10D–Dy2–O11      | 73.87(10)  | O9D–Dy3–O14E  | 123.80(13) |
| O1–Dy2–O11        | 75.10(9)   | O19F–Dy3–O14E | 149.87(15) |

<sup>a</sup> symmetry transformation for equivalent atoms: A  $x, -y + 3/2, z - 1/2$ ; B  $x - 1, y, z$ ; C  $-x + 3, -y + 1, -z$ ; D  $-x + 4, y + 1/2, -z + 1/2$ ; E  $-x + 3, y - 1/2, -z + 1/2$ ; F  $x + 1, -y + 3/2, z - 1/2$ .
